# Supplementary material for: Bi-intercalated vanadium pentoxide synthesized via hydrogen peroxide-induced phase transition for highly stable cathode in aqueous zinc ion batteries
Source: Royal Society of Chemistry journal article supplement (doi:10.1039/d3ta07984h), 2024-01-01
Supplement: d3ta07984h1.pdf [file d3ta07984h1.pdf]

**Table S1.** Differences between aqueous zinc ion batteries and lithium ion batteries.

|                               | Aqueous zinc-ion batteries (ZIBs)                                                                                                     | Lithium ion batteries (LIBs)                                                         |
|-------------------------------|---------------------------------------------------------------------------------------------------------------------------------------|--------------------------------------------------------------------------------------|
| Anode material                | Zinc foil                                                                                                                             | Lithium flake, graphite, etc.                                                        |
| Cathode material              | Vanadium-based materials,<br>manganese-based materials,<br>Prussian blue analogue, etc.                                               | Lithium iron phosphate, NCM<br>ternary materials, lithium<br>manganate, etc.         |
| Electrolytes                  | Aqueous solutions of zinc salts<br>such as zinc sulphate, zinc<br>trifluoromethanesulfonate, etc.                                     | Generally consists of several<br>lithium salts and organic solvents.                 |
| Theoretical Specific Capacity | High capacity                                                                                                                         | Lower capacity                                                                       |
| Costs                         | Low cost                                                                                                                              | High cost                                                                            |
| Cycle life                    | The cycle number of aqueous zinc-<br>ion batteries has exceeded 80,000<br>cycles. <sup>1</sup>                                        | Lithium batteries currently have a<br>maximum cycle life of 8,000-<br>10,000 cycles. |
| Security                      | The aqueous solution as an<br>electrolyte is non-flammable,<br>avoiding high temperatures,<br>combustion and other safety<br>hazards. | Organic electrolytes are flammable<br>and less safe.                                 |
| Environmentally compatible    | Lithium resources in lithium-ion<br>batteries are limited and the<br>mining process has an<br>environmental impact.                   | Zinc is abundant and<br>environmentally friendly in<br>aqueous zinc ion batteries.   |

**Table S2.** Common synthetic methods of vanadate hydrate.

| Synthesis method                                                              | Vanadium precursor | Conditions           | Products                           | Microscopic morphology | Source    |
|-------------------------------------------------------------------------------|--------------------|----------------------|------------------------------------|------------------------|-----------|
| hydrothermal reaction and freeze dried                                        | $V_2O_5$           | at 180 °C for 24 h   | $Na_{0.48}V_2O_5 \cdot nH_2O$      | nanosheet              | 2         |
| hydrothermal reaction and pH=3.5                                              | $NH_4VO_3$         | at 170 °C for 10 h   | $Ca_{0.67}V_8O_{20} \cdot 3.5H_2O$ | nanobelts              | 3         |
| solvothermal method in 30 mL 1 M acetic acid aqueous solution                 | $V_2O_5$           | at 200 °C for 72 h   | $Co_{0.247}V_2O_5 \cdot 0.944H_2O$ | nanosheets             | 4         |
| scalable microwave approach d in 50 ml of 15:1 water/acetone (volume) mixture | $V_2O_5$           | at 180 °C for 10 min | $Zn_{0.25}V_2O_5 \cdot nH_2O$      | nanobelt               | 5         |
| hydrothermal reaction with $H_2O_2$                                           | $V_2O_5$           | at 190 °C for 8 h    | $K_xV_2O_5 \cdot nH_2O$            | nanorods               | this work |

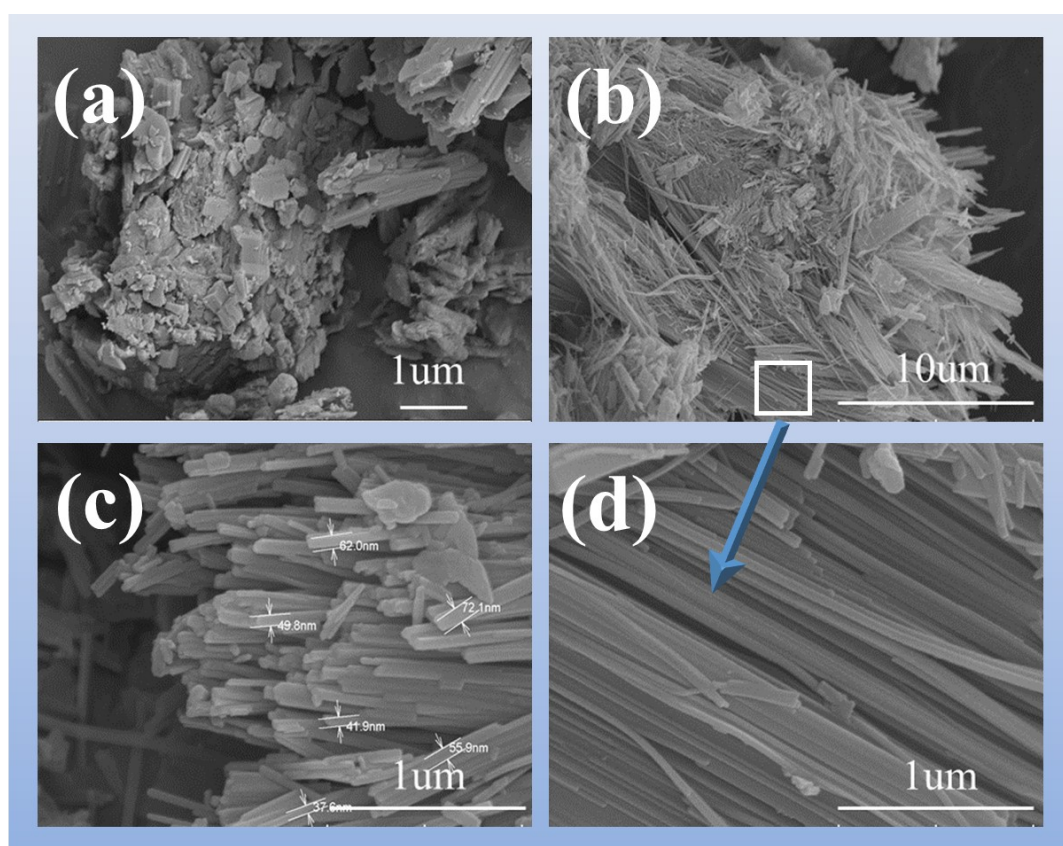**Figure S1** (a) SEM pattern of  $V_2O_5$ , (b) (c) (d) SEM patterns of VOH.

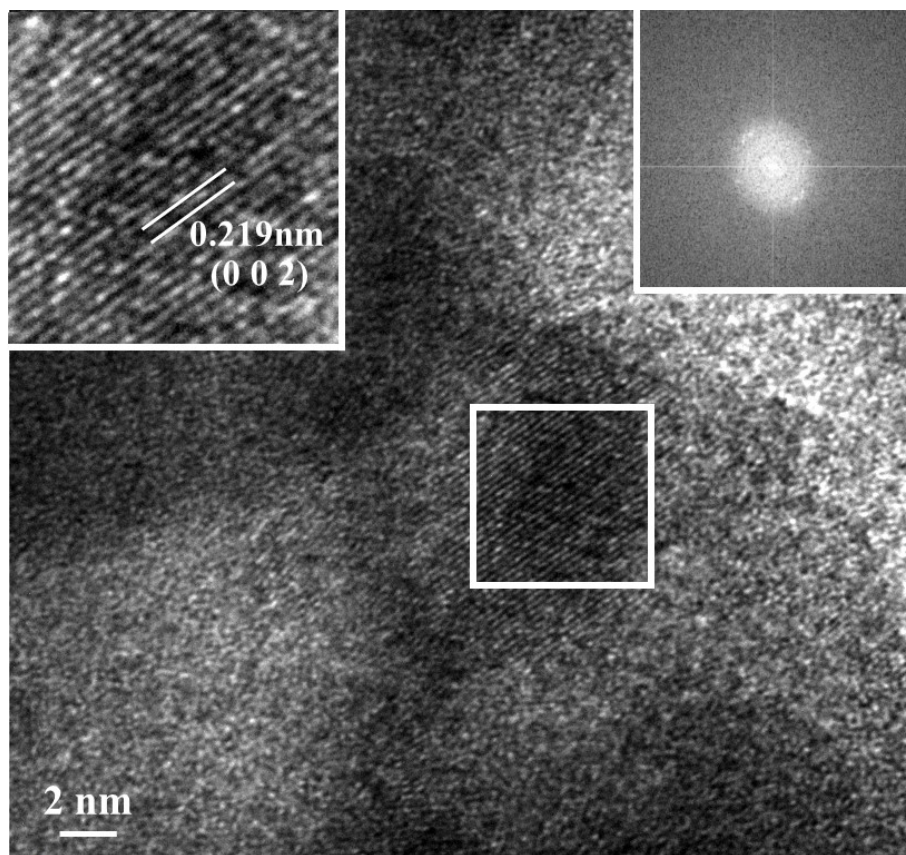

**Figure S2** TEM pattern of  $V_2O_5$ .

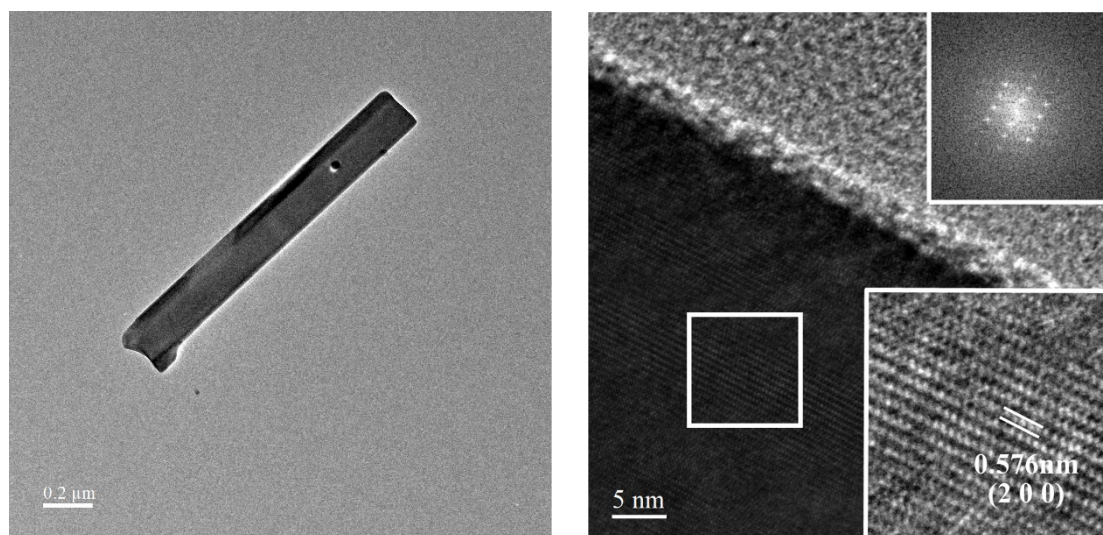

**Figure S3** TEM pattern of  $KVOH$ .

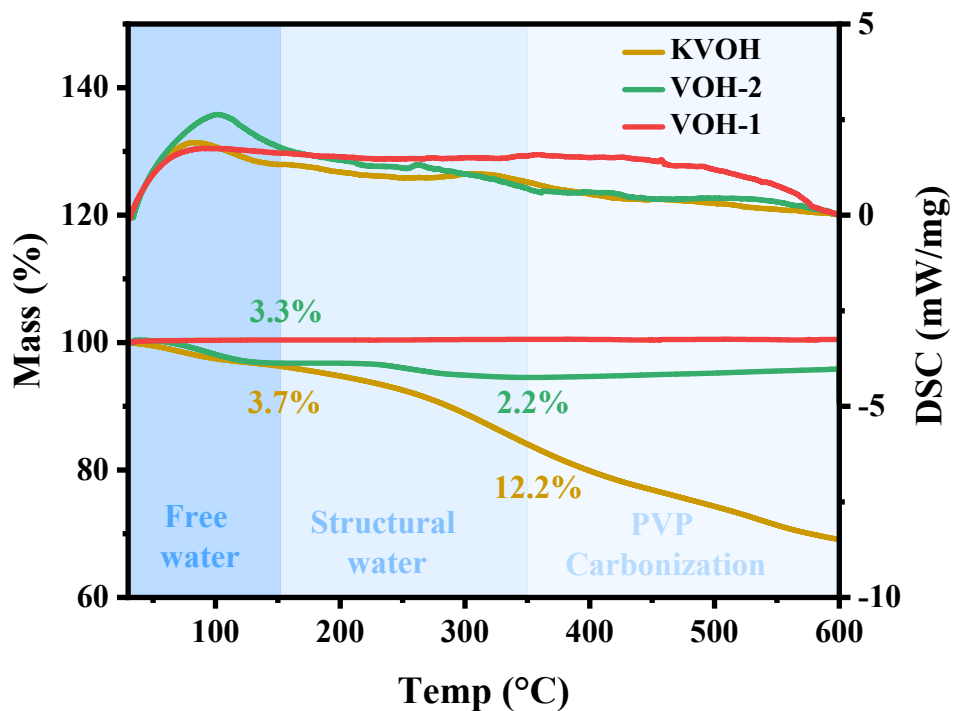

Figure S4 TG-DSC results of KVOH, VOH-2 and VOH-1.

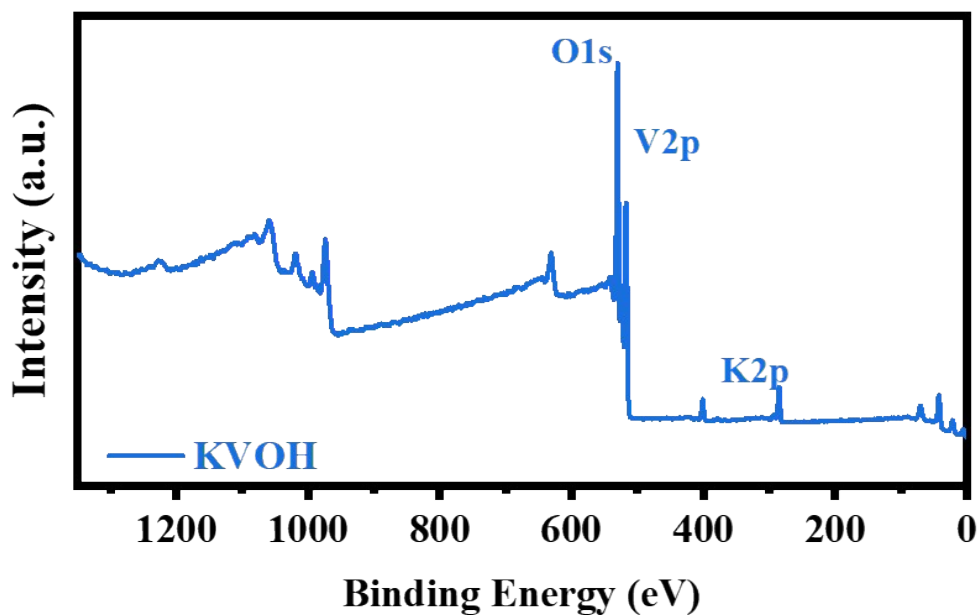

Figure S5 XPS full spectrum of the KVOH sample.

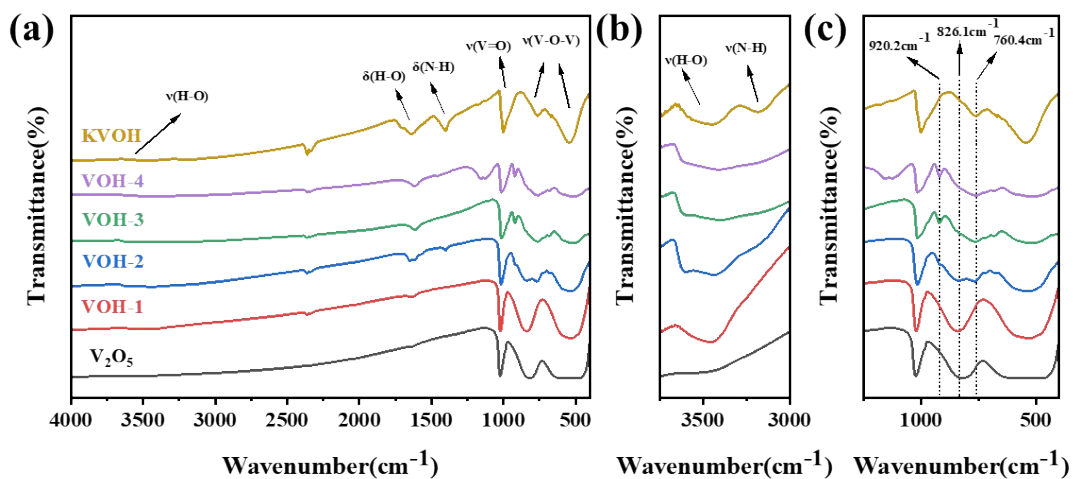

**Figure S6** Fourier transform infrared (FT-IR) spectra of samples.

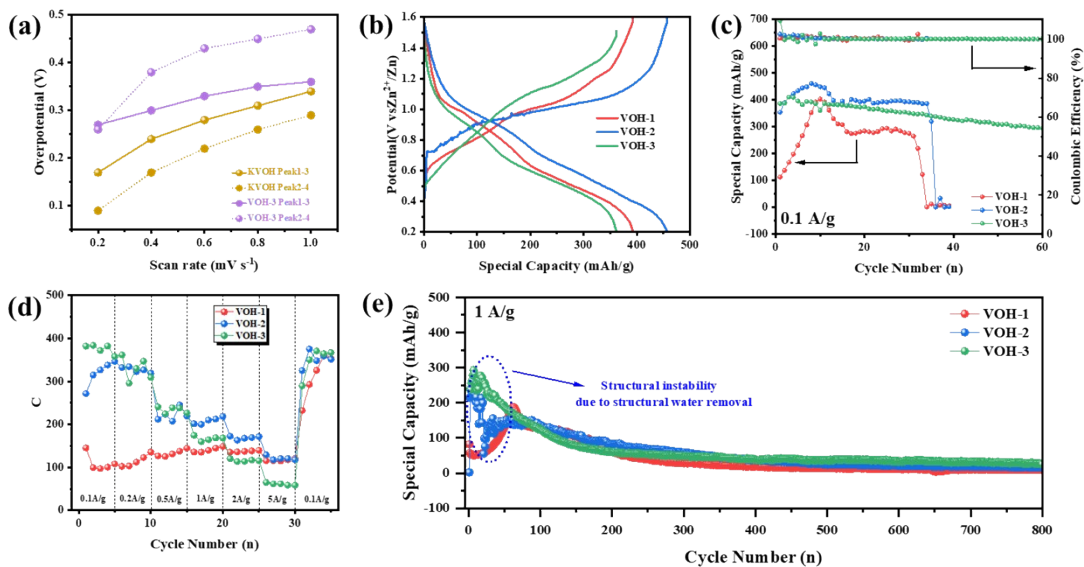

**Figure S7** (a) Overpotentials of CVs at different scan rates, (b) Charge/discharge profiles at  $0.1 \text{ A g}^{-1}$ . (c) Cyclic performance at  $0.1 \text{ A g}^{-1}$  for 60 cycles. (d) Rate performance of the samples. (e) Long cyclic performance at  $1 \text{ A g}^{-1}$  for 800 cycles.

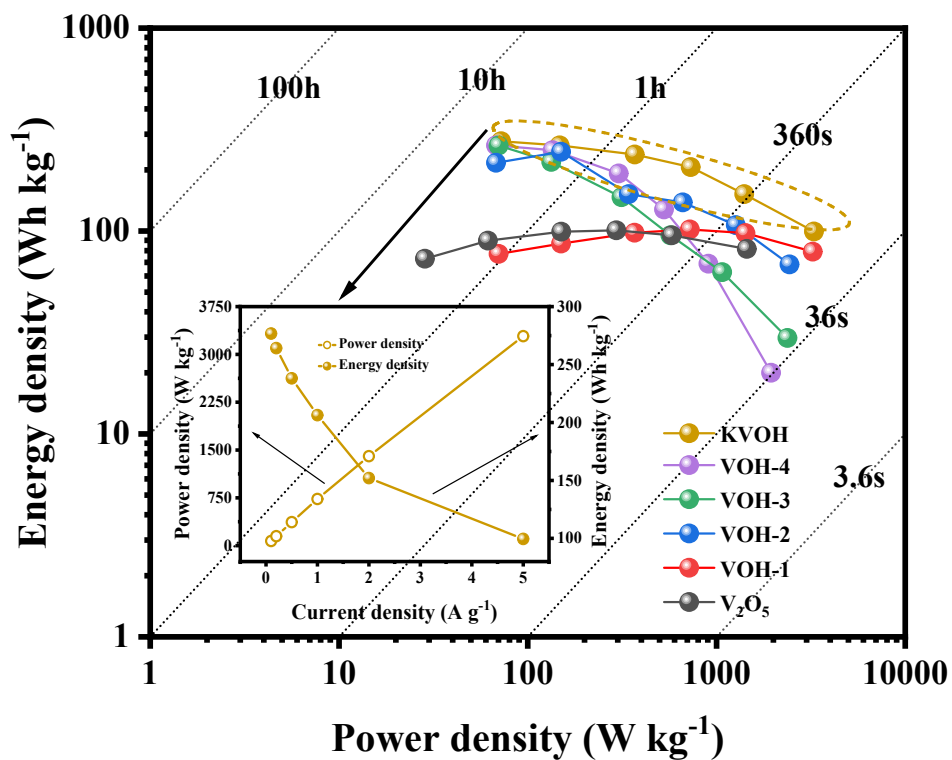

Figure S8 Ragone plots of different samples, inset shows energy density and power density at different current densities.

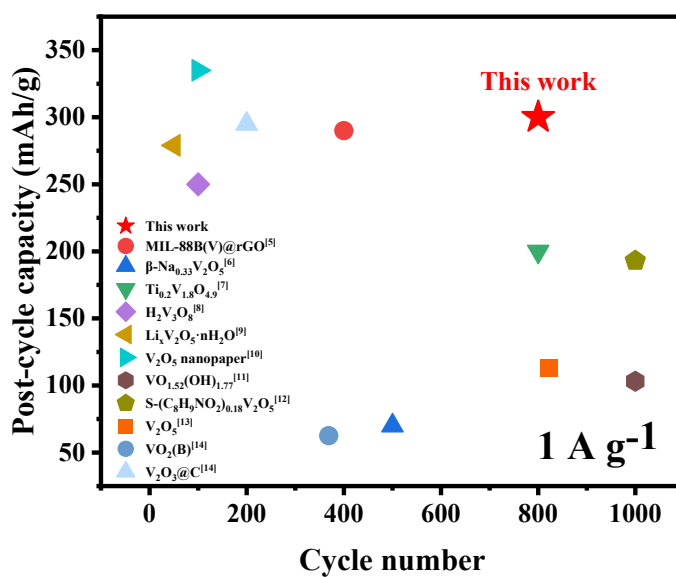

Figure S9 Comparison of electrochemical properties.<sup>6-15</sup>

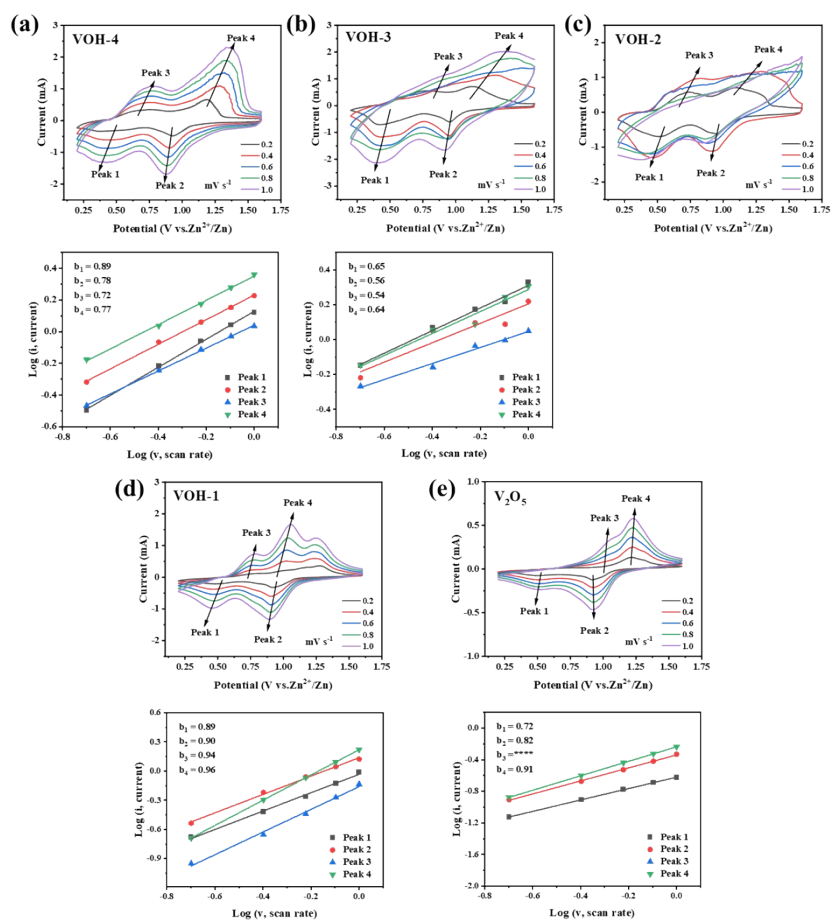

**Figure S10** CV curves at multiple scan rates of samples. Log (i) versus log (v) plots of four redox peaks in CV curves. (a) VOH-4, (b) VOH-3, (c) VOH-2, (d) VOH-1, (e) V<sub>2</sub>O<sub>5</sub>.

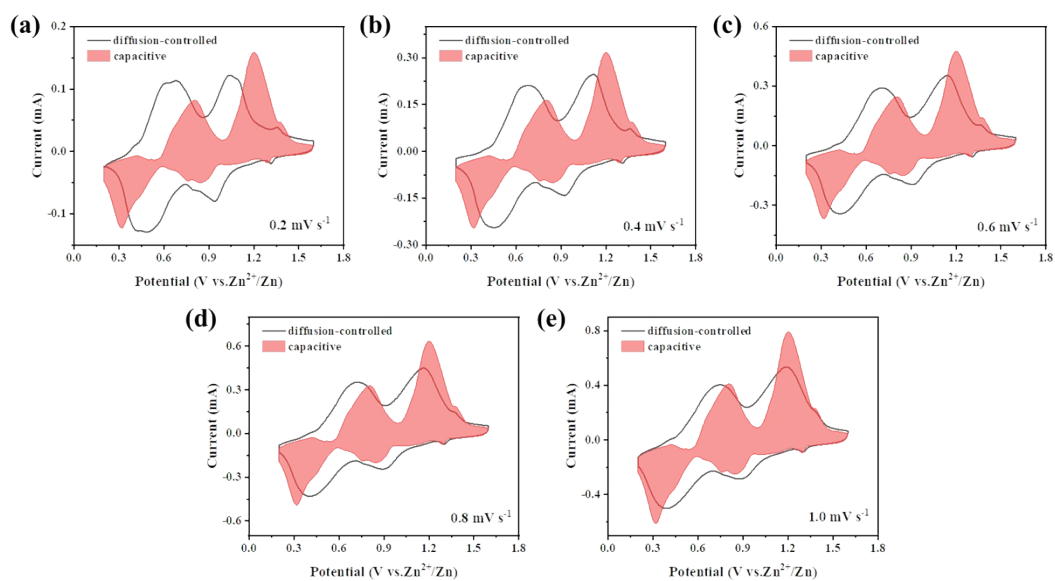

**Figure S11** Fitting of pseudocapacitance at different scan rates. (a) 0.2 mV s<sup>-1</sup>, (a) 0.4 mV s<sup>-1</sup>, (a) 0.6 mV s<sup>-1</sup>, (a) 0.8 mV s<sup>-1</sup>, (a) 1.0 mV s<sup>-1</sup>.

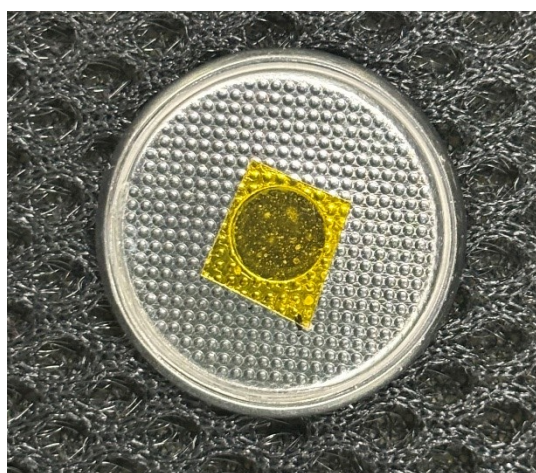

**Figure S12** Cell for in situ XRD testing.

**Table S3**  $R_{ct}$  and  $R_s$  obtained by fitting the semicircle of the high frequency region of the impedance curve.

| Samples               | $V_2O_5$ | VOH-1 | VOH-2  | VOH-3 | VOH-4 | KVOH  |
|-----------------------|----------|-------|--------|-------|-------|-------|
| $R_{ct}$ ( $\Omega$ ) | 201.4    | 200.3 | 1496.3 | 311.3 | 267.7 | 331.1 |
| $R_s$ ( $\Omega$ )    | 1.819    | 1.142 | 3.447  | 0.031 | 0.622 | 0.761 |

**Table S4.** The lattice parameters for compound  $V_2O_5$  and  $V_2O_5 \cdot H_2O$  of (1 $\times$ 2 $\times$ 1) supercell.

| Compound            | a ( $\text{\AA}$ ) | b ( $\text{\AA}$ ) | c ( $\text{\AA}$ ) |
|---------------------|--------------------|--------------------|--------------------|
| $V_2O_5$            | 11.50              | 14.18              | 8.69               |
| $V_2O_5 \cdot H_2O$ | 11.48              | 14.22              | 17.72              |

### Electrochemical Characterization.

The electrode material consisted of active material (70 wt%), acetylene black (20% wt%) and polyvinylidene fluoride (PVDF, 10 wt%), and then the slurry was coated on stainless steel foil after stirring and heated under vacuum at 80°C. The thickness of the



slurry coated on stainless steel foil is 200  $\mu\text{m}$ . Dry in the oven for 12 h. Zinc foil was used as the negative electrode material, glass fiber membrane (GF/F) acted as a diaphragm, and 3 M aqueous solution of zinc trifluoromethanesulfonate was used as the electrolyte. Coin cells (CR2016) were assembled in air using a tablet press, and the electrochemical performance of the cells was tested using the battery testing system of Wuhan LAND Electronic Co.Ltd.

### **Materials Characterization**

The crystal structure was characterized by X-ray diffraction (XRD), the micromorphology was characterized by Scanning electron microscopy (SEM) and Transmission Electron Microscope (TEM), the surface element valence was characterized by X-ray photoelectron spectroscopy (XPS), the water content was measured by TG/DSC, and the surface element distribution was characterized by Energy dispersive X-ray spectroscopy (EDS). Fourier Transform infrared spectroscopy (FT-IR) is used to analyse changes in the functional groups of materials. The structural changes of electrode materials during battery charging and discharging were monitored using in situ X-ray diffractometry. The measurement was set up for a period of 120 minutes. The target material chosen was a molybdenum target with a wavelength of 0.7107 $\text{\AA}$ .

### **Computational details**

First-principles calculations were carried out with the Vienna Ab Initio Simulation Package (VASP)<sup>16</sup> and the projector-augmented wave (PAW)<sup>17</sup> method was used to treat the interaction between electrons and ions.<sup>18,19</sup> The GGA+U model was further

applied to describe the three-dimensional orbital electronic structure. The U values of V was 3.25 eV.<sup>20,21</sup> For the poor convergence of the zinc ion diffusion model, we use DFT instead of DFT-u in the follow-up. The structure is optimized using the cutoff energy = 400 eV with energy and force convergence criteria of 10<sup>-4</sup> eV and 0.1 eV/Å, respectively. The Brillouin zone was sampled using Monkhorst-Pack with a grid of 6×3×6 k-points.

## Reference

- 1 M. Zhao, J. Rong, F. Huo, Y. Lv, B. Yue, Y. Xiao, Y. Chen, G. Hou, J. Qiu and S. Chen, *Adv. Mater.*, 2022, **34**, 2203153.
- 2 W. Zhou, J. Chen, C. He, M. Chen, X. Xu, Q. Tian, J. Xu and C.-P. Wong, *Electrochimica Acta*, 2019, **321**, 134689.
- 3 K. Zhu, T. Wu and K. Huang, *ACS Nano*, 2019, **13**, 14447–14458.
- 4 L. Ma, N. Li, C. Long, B. Dong, D. Fang, Z. Liu, Y. Zhao, X. Li, J. Fan, S. Chen, S. Zhang and C. Zhi, *Adv. Funct. Mater.*, 2019, **29**, 1906142.
- 5 D. Kundu, B. D. Adams, V. Duffort, S. H. Vajargah and L. F. Nazar, *Nat. Energy*, 2016, **1**, 1–8.
- 6 D. Jia, Z. Shen, Y. Lv, Z. Chen, H. Li, Y. Yu, J. Qiu and X. He, *Adv. Funct. Mater.*, **n/a**, 2308319.
- 7 D. Pan, T. Liu, Y. Zhang, H. liu, M. Ding and L. Chen, *J. Alloys Compd.*, 2022, **895**, 162615.
- 8 Z. Wei, X. Wang, T. Zhu, P. Hu, L. Mai and L. Zhou, *Chin. Chem. Lett.*, 2024, **35**, 108421.
- 9 P. He, Y. Quan, X. Xu, M. Yan, W. Yang, Q. An, L. He and L. Mai, *Small*, 2017, **13**, 1702551.
- 10 Y. Yang, Y. Tang, G. Fang, L. Shan, J. Guo, W. Zhang, C. Wang, L. Wang, J. Zhou and S. Liang, *Energy Environ. Sci.*, 2018, **11**, 3157–3162.
- 11 Y. Li, Z. Huang, P. K. Kalambate, Y. Zhong, Z. Huang, M. Xie, Y. Shen and Y. Huang, *Nano Energy*, 2019, **60**, 752–759.
- 12 X. Xie, N. Wang, B. Sun, S. Komarneni and W. Hu, *Appl. Surf. Sci.*, 2023, **619**, 156704.
- 13 Y. Liu and Y. Gong, *Nanoscale*, 2023, **15**, 6273–6284.
- 14 W. Liu, H. Zong, M. Li, Z. Zeng, S. Gong, K. Yu and Z. Zhu, *ACS Appl. Mater. Interfaces*, 2023, **15**, 13554–13564.
- 15 Y. Ding, Y. Peng, S. Chen, X. Zhang, Z. Li, L. Zhu, L.-E. Mo and L. Hu, *ACS Appl. Mater. Interfaces*, 2019, **11**, 44109–44117.
- 16 P. E. Blöchl, *Phys. Rev. B*, 1994, **50**, 17953–17979.
- 17 G. Kresse and D. Joubert, *Phys. Rev. B*, 1999, **59**, 1758–1775.

- 18 G. Kresse and J. Furthmüller, *Phys. Rev. B*, 1996, **54**, 11169–11186.
- 19 J. P. Perdew, K. Burke and M. Ernzerhof, *Phys. Rev. Lett.*, 1996, **77**, 3865–3868.
- 20 S. P. Ong, S. Cholia, A. Jain, M. Brafman, D. Gunter, G. Ceder and K. A. Persson, *Comput. Mater. Sci.*, 2015, **97**, 209–215.
- 21 A. Jain, S. P. Ong, G. Hautier, W. Chen, W. D. Richards, S. Dacek, S. Cholia, D. Gunter, D. Skinner, G. Ceder and K. A. Persson, *APL Mater.*, 2013, **1**, 011002.
